# Supplementary material for: OMEN-SED 1.0: a novel, numerically efficient organic matter sediment diagenesis module for coupling to Earth system models
Source: Copernicus journal article supplement (doi:10.5194/gmd-11-2649-2018), 2018-07-09
Supplement: Supplementary file 1 [file gmd-11-2649-2018-supplement.zip]

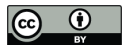

## *Supplement of*

# **OMEN-SED 1.0: a novel, numerically efficient organic matter sediment diagenesis module for coupling to Earth system models**

**Dominik Hülse et al.**

*Correspondence to:* Dominik Hülse ([dominik.huelse@ucr.edu](mailto:dominik.huelse@ucr.edu))

- [gmd-11-2649-2018-supplement-title-page.pdf](#)
- OMEN\_code\_080518
  - OMEN\_FORTRAN
    - \* [sedgem\\_box\\_benthic.f90](#)
  - OMEN\_MATLAB
    - \* [ReadMe.m](#)
    - \* [benthic\\_main.m](#)
    - \* [benthic\\_test.m](#)
    - \* [benthic\\_utils.m](#)
    - \* [benthic\\_zALK.m](#)
    - \* [benthic\\_zDIC.m](#)
    - \* [benthic\\_zH2S.m](#)
    - \* [benthic\\_zNH4.m](#)
    - \* [benthic\\_zNO3.m](#)
    - \* [benthic\\_zO2.m](#)
    - \* [benthic\\_zPO4\\_M.m](#)
    - \* [benthic\\_zSO4.m](#)
    - \* [benthic\\_zTOC.m](#)
    - \* [fzero\\_vec.m](#)

The copyright of individual parts of the supplement might differ from the CC BY 4.0 License.
